# Supplementary material for: Coordination of canonical and noncanonical Hedgehog signalling pathways mediated by WDR11 during primordial germ cell development
Source: Sci Rep. 2023 Jul 29;13:12309. doi: 10.1038/s41598-023-38017-9 (PMC10387110; doi:10.1038/s41598-023-38017-9)
Supplement: Supplementary file 4 — Supplementary Information 2. [file 41598_2023_38017_MOESM4_ESM.xlsx]

## Sheet: Fig 1B
	Number of PGCs (E9.5, E10.5, E11.5)		E9.5	Wdr11+/+	Wdr11-/-		E10.5	Wdr11+/+	Wdr11-/-		E11.5	Wdr11+/+	Wdr11-/-
			1	59	42		1	225	147		1	374	236
			2	76	46		2	224	171		2	421	289
			3	54	44		3	242	93		3	466	152
			4	61	54		4	198	158		4	302	278
			5	89	51		5	175	126		5	440	245
			Av	67.8	47.4		Av	212.8	139		Av	400.6	240
			SEM	6.44515	2.22711		SEM	11.7788	13.6638		SEM	28.8749	24.1143
	Number of PGCs (E10.5)		Count	Wdr11+/+1	Wdr11+/+2	Wdr11+/+3	Wdr11+/+4	Wdr11+/+5	Av	SEM				Total PGCs
			gr	213	219	238	192	170	206.4	11.6902					Wdr11+/+	Wdr11-/-
			hg	2	0	0	2	3	1.4	0.6				gr	206	101
			mes	12	10	4	6	4	7.2	1.62481				hg	1	27
			Total	227	229	242	200	177	215					mes	5.6	11
			Count	Wdr11-/-1	Wdr11-/-2	Wdr11-/-3	Wdr11-/-4	Wdr11-/-5	Av	SEM				SEM	Wdr11+/+	Wdr11-/-
			gr	115	119	67	102	100	100.6	9.15751				gr	11.7	9
			hg	25	38	19	40	15	27.4	5.006				hg	0.4	5
			mes	7	14	7	16	11	11	1.81659				mes	1.4	1.8
			Total	147	171	93	158	126	139
	Ectopic PGCs (E10.5)		WT Count	Wdr11+/+1	Wdr11+/+2	Wdr11+/+3	Wdr11+/+4	Wdr11+/+5	Av	SEM
			gr	213	219	238	192	170	206.4	11.6902
			ectopic (hg+mes)	14	10	4	8	7	8.6	1.66132
			Total	227	229	242	200	177	215
														Ectopic PGCs (hg+mes)
			KO Count	Wdr11-/-1	Wdr11-/-2	Wdr11-/-3	Wdr11-/-4	Wdr11-/-5	Av	SEM					Wdr11+/+	Wdr11-/-
			gr	115	119	67	102	100	100.6	9.15751				Total	9	38
			ectopic (hg+mes)	32	52	26	56	26	38.4	6.49307				%	4	38
			Total	147	171	93	158	126	139
			WT Percentage	Wdr11+/+1	Wdr11+/+2	Wdr11+/+3	Wdr11+/+4	Wdr11+/+5	Av	SEM
			ectopic (hg+mes)	5.7	4.6	1.7	4.2	2.9	3.82	0.69383
			KO Percentage	Wdr11-/-1	Wdr11-/-2	Wdr11-/-3	Wdr11-/-4	Wdr11-/-5	Av	SEM
			ectopic (hg+mes)	27.8	43.7	38.8	54.9	25	38.04	5.43954

## Sheet: Fig 1D
	Total PH3							PH3+ PGCs						Somatic
		DAPI	PH3	PH3+(%)					PGCs	PH3+ PGCs	%				Total PH3	PH3+ PGCs	Total - PH3+ PGCs	DAPI	PH3+(%)
	WT1	1081	251	23.2192				WT1	252	52	20.6349			WT1	251	22	229	1081	21.1841
	WT2	1080	256	23.7037				WT2	235	44	18.7234			WT2	256	44	212	1080	19.6296
	WT3	1212	268	22.1122				WT3	211	47	22.2749			WT3	295	25	270	1212	22.2772
	WT4	1099	219	19.9272				WT4	183	34	18.5792			WT4	235	27	208	1099	18.9263
	WT5	1101	203	18.4378				WT5	194	54	27.8351			WT5	288	14	274	1101	24.8865
	WT6	1147	298	25.9808				WT6	218	38	17.4312			WT6	298	31	267	1147	23.2781
	WT7	1190	300	25.2101				WT7	206	42	20.3883			WT7	300	42	258	1190	21.6807
	Average	1130	256.429	22.6559				Average	214.143	44.4286	20.8381			Average	274.714	29.2857	245.429	1130	21.6946
	Std			2.72421				std	23.5756	7.2078	3.47483			Std			28.3776	53.7215	2.05034
	SEM			1.02966				sem	8.91074	2.72429	1.31336			SEM			10.7257	20.3048	0.774956
		DAPI	PH3	PH3+(%)					PGCs	PH3+ PGCs	%				Total PH3	PH3+ PGCs	Total - PH3+ PGCs	DAPI	PH3+(%)
	Null1	1107	160	14.4535				Null1	139	22	15.8273			Null1	160	11	149	1107	13.4598
	Null2	995	188	18.8945				Null2	120	15	12.5			Null2	188	15	173	995	17.3869
	Null3	986	168	17.0385				Null3	164	24	14.6341			Null3	198	15	183	986	18.5598
	Null4	1054	209	19.8292				Null4	123	16	13.0081			Null4	209	16	193	1054	18.3112
	Null5	1093	212	19.3962				Null5	147	25	17.0068			Null5	212	25	187	1093	17.1089
	Average	1047	187.4	17.9224				Average	138.6	20.4	14.5953			Average	193.4	16.4	177	1047	16.9653
	Std			2.21176				std	18.0638	4.61519	1.88707			Std			17.2627	55.2042	2.05188
	SEM			0.989128				sem	8.07837	2.06398	0.843924			SEM			7.7201	24.6881	0.91763

## Sheet: Fig 2B & C
	Accumulated distance
	Embryo slice	(+/+)	(-/-)
	1	146.17	112.87
	2	139.36	122.21
	3	151.7	103.61
	4	165.48	125.72
	5	170.61	92.96
	6	148.4	87.291
	7	161.98
	8	127.4
	9	144.7
	Av	150.644	107.444
	SEM	4.52825	6.35641
	Euclidean distance
	Embryo slice	(+/+)	(-/-)
	1	81.2	42.11
	2	99.22	48.83
	3	106.82	70.62
	4	94.71	49.37
	5	74.81	51.75
	6	87.53	41.29
	7	91
	8	82.089
	9	75.44
	Av	88.091	50.6617
	SEM	3.62698	4.34167
	Velocity
	Embryo slice	(+/+)	(-/-)
	1	7.32	5.53
	2	7.3	6.25
	3	6.28	5.81
	4	8.77	8.09
	5	12.59	5.27
	6	13.17	7.08
	7	11.58
	8	9.42
	9	5.75
	Av	9.13111	6.33833
	SEM	0.918039	0.435893
	Directionality
	Embryo slice	(+/+)	(-/-)
	1	0.56	0.37
	2	0.71	0.4
	3	0.7	0.68
	4	0.57	0.39
	5	0.44	0.55
	6	0.59	0.47
	7	0.56
	8	0.64
	9	0.52
	Av	0.587778	0.476667
	SEM	0.0285179	0.0488308
	Survival
	Embryo slice	(+/+)	(-/-)
	1	13.5	14.5
	2	13	16
	3	16	15.5
	4	18.75	14
	5	15	16.5
	6	17	18
	7	18
	8	18.75
	9	15
	Av	16.1111	15.75
	SEM	0.719412	0.588076
	E10.5 Wdr11 +/+ slice culture
		Velocity											Accumulated distance											Euclidean distance											Directionality											Survival
	Cell	Slice 1	Slice 2	Slice 3	Slice 4	Slice 5	Slice 6	Slice 7	Slice 8	Slice 9		Cell	Slice 1	Slice 2	Slice 3	Slice 4	Slice 5	Slice 6	Slice 7	Slice 8	Slice 9		Cell	Slice 1	Slice 2	Slice 3	Slice 4	Slice 5	Slice 6	Slice 7	Slice 8	Slice 9		Cell	Slice 1	Slice 2	Slice 3	Slice 4	Slice 5	Slice 6	Slice 7	Slice 8	Slice 9		Cell	Slice 1	Slice 2	Slice 3	Slice 4
	1	9.95	5.76	4.08	6.38	8.41	13.56	13.56	9.82	5.42		1	130.98	170.3	102.92	143.35	189.92	138.56	150.78	142.65	134.95		1	80.38	100.43	96.51	75.83	70.29	62.81	86.38	118.38	82.31		1	0.52	0.75	0.72	0.57	0.48	0.63	0.63	0.68	0.51		1	12.5	14	16.5	17.5
	2	10.27	8.13	6.53	8.66	15.36	15.26	9.13	4.04	5.41		2	138.69	134.71	151.46	173.09	192.5	136.24	173.63	120.16	140.86		2	73.75	118.96	111.94	101.86	54.92	75.21	70.27	72.06	83.72		2	0.57	0.69	0.7	0.46	0.44	0.55	0.48	0.72	0.51		2	12	16	14.5	20.5
	3	8.57	4.97	8.45	6.91	11.55	9.76	8.76	6.46	5.15		3	141.66	133.59	147.98	175.77	169.11	161.46	164.68	128.38	158.59		3	56.11	120.79	90.99	84.03	62.11	78.59	104.66	86.43	100.55		3	0.54	0.73	0.61	0.65	0.41	0.64	0.57	0.65	0.59		3	13	15	15.5	17
	4	7.3	11.55	3.03	12.72	14.81	10.02	12.56	13.81	8.03		4	144.39	104.01	141.5	155.25	172.22	153.91	152.99	130.12	166.78		4	76.55	103.26	111.75	64.7	75.9	64.92	110.45	71.01	65.24		4	0.45	0.68	0.79	0.52	0.4	0.61	0.54	0.62	0.52		4	13	12	15.5	17.5
	5	5.13	8.6	8.46	9.13	7.84	12.43	10.42	11.92	5.88		5	150.12	133.97	145.73	152.74	176.38	176.62	167.41	133.19	124.04		5	61.86	95.62	116.68	76.87	85.94	73.27	95.52	75.4	83.64		5	0.6	0.76	0.75	0.61	0.41	0.64	0.61	0.61	0.49		5	14.5	11	17.5	19
	6	6.26	3.95	6.73	7.55	10.94	18.03	9.74	9.78	6.82		6	126.78	155.57	153.5	203.4	169.81	140.16	175.3	129.42	145.6		6	97.45	79	122.69	100.46	70.01	95.95	73.24	68.26	79.28		6	0.59	0.71	0.63	0.49	0.54	0.67	0.54	0.65	0.51		6	13.5	11.5	15	18.5
	7	7.18	10.38	3.63	6.81	12.29	12.32	9.95	10.32	4.96		7	163.07	141.43	164.53	170.92	164.33	162.56	156.69	124.51	154.43		7	80.72	105.79	93.81	124.69	75.88	95.03	82.62	102.96	65.93		7	0.61	0.71	0.67	0.57	0.55	0.49	0.47	0.59	0.53		7	12.5	12	16	19.5
	8	7.39	7.87	8.16	11.61	15.86	7.24	14.41	8.09	6.55		8	140.26	130.22	157.08	167.52	166.7	158.96	179.61	108.6	164.11		8	99.57	114.96	103.09	90.27	83.72	108.26	76.78	81.7	71.63		8	0.58	0.66	0.61	0.64	0.51	0.52	0.56	0.66	0.57		8	14.5	12	12.5	20.5
	9	8.18	9.71	8.2	6.94	11.59	13.86	8.99	7.19	5.12		9	147.15	157.03	174.03	169.86	155.92	138.23	167.8	121.37	129.91		9	111.73	103.96	117.75	112.74	58.27	122.82	121.03	91.64	83.43		9	0.57	0.69	0.72	0.49	0.38	0.6	0.44	0.66	0.39		9	14	16.5	15	16.5
	10	6.92	6.39	4.57	9.91	13.78	11.06	10.45	9.82	5.76		10	164.48	134.18	137.18	166.3	174.62	164.93	147.69	137.31	147.69		10	59.9	97.32	122.43	92.49	72.77	87.05	92.72	66.3	50.83		10	0.51	0.74	0.68	0.53	0.45	0.51	0.66	0.57	0.53		10	13	15	17.5	21
	11	5.44	8.67	8.78	6.76	13.9	16.77	11.2	11.3	6.37		11	172.86	166.86	168.58	171.98	158.4	176.13	174.51	130.38	114.93		11	66.46	86.42	91.55	89.27	65.17	67.83	96.96	70.66	94.72		11	0.57	0.71	0.7	0.58	0.47	0.57	0.56	0.62	0.57		11	13	15	16	18.5
	12	10.19	4.51	7.17	9.24	12.67	14.04	12.55	10.14	5.7		12	162.54	130.98	158.56	163.98	151.05	156.54	159.95	126.71	162.46		12	72.91	89.87	102.7	105.47	61.9	84.03	87.21	97.97	80.01		12	0.56	0.72	0.68	0.53	0.41	0.64	0.65	0.69	0.54		12	13.5	12.5	18	17
	13	9.84	6.1	5.99	9.83	10.8	12.65	13.75	13.76	7.67		13	151.71	152.43	143.77	179.55	184.19	120.24	169.4	113.36	142.91		13	86.26	110.28	124.45	97.63	85.61	86.41	69.73	76.19	64.65		13	0.49	0.78	0.82	0.67	0.36	0.52	0.54	0.66	0.55		13	12.5	11	15	19.5
	14	4.51	8.18	3.35	7.33	14.92	19.12	15.81	7.11	5.61		14	153.74	118.79	172.18	154.41	181.65	132.39	166	120.55	125.65		14	90	104.49	108.94	107.93	91.73	72.24	81.4	80.03	92.21		14	0.59	0.74	0.75	0.65	0.44	0.61	0.65	0.61	0.55		14	13	13	15.5	20.5
	15	8.14	10.41	8.63	9.79	12.61	13.78	9.26	8.49	4.99		15	143.25	113.74	170.29	153.56	175.71	139.22	160.01	135.72	147.32		15	76.73	89.69	106.18	115.19	74	88.47	91.46	73.72	52.63		15	0.64	0.68	0.63	0.54	0.34	0.66	0.53	0.58	0.49		15	11	13	16.5	16
	16	7.61	7.51	11.5	10.82	8.79	12.67	17.72	10.6	5.63		16	121.94	139.04	156.57	167.38	183.27	146.68	149.78	129.92	130.73		16	80.16	96.27	90.25	99.84	82.2	108.45	81.96	66.7	95.11		16	0.51	0.53	0.74	0.62	0.52	0.49	0.54	0.73	0.5		16	14	11	15	17.5
	17	5.23	9.09	6.59	9.29	11.62	9.78	13.99	6.23	5.4		17	155.82	144.21	163.91	155.56	158.99	168.42	157.92	117.65	145.43		17	87.98	90.15	105.3	73.53	128.83	83.96	100.68	75.21	56.78		17	0.53	0.78	0.73	0.5	0.44	0.57	0.47	0.71	0.62		17	16	10.5	15.5	19.5
	18	6.02	4.32	4.94	6.95	13.94	18.13	10.74	9.16	4.88		18	164.52	128.65	157.83	147.49	159.03	144.61	151.79	155.1	160.11		18	80.28	87.29	110.64	100.63	69.53	117.37	117.88	62.26	48.81		18	0.64	0.75	0.62	0.57	0.36	0.6	0.52	0.56	0.45		18	15	12	18	20.5
	19	4.44	6.61	2.66	7.06	14.33	13.71	11.18	8.56	6.26		19	137.74	129.04	135.76	155.58	154.18	122.27	158.89	116.61	137.83		19	104.89	76.03	97.72	87.8	62.05	94.15	106.51	89.3	89.64		19	0.53	0.68	0.67	0.55	0.51	0.57	0.64	0.59	0.53		19	16	13	16.5	19.5
	20	7.84	3.25	4.11	11.76	15.88	9.19	7.37	11.84	3.46		20	111.65	168.52	130.58	181.87	174.27	130.58	154.72	126.34	159.72		20	80.36	113.83	111.09	92.93	65.39	83.7	72.46	114.1	67.6		20	0.54	0.72	0.68	0.6	0.41	0.61	0.52	0.57	0.44		20	14	14	18.5	18.5
	Average	7.3205	7.298	6.278	8.7725	12.5945	13.169	11.577	9.422	5.7535		Average	146.168	139.364	151.697	165.478	170.613	148.435	161.977	127.403	144.703		Average	81.2025	99.2205	106.823	94.708	74.811	87.526	90.996	82.014	75.436		Average	0.557	0.7105	0.695	0.567	0.4415	0.585	0.556	0.6365	0.5195		Average	13.525	13	16	18.725
	Std	1.85562	2.36717	2.41141	1.93456	2.41759	3.18955	2.64957	2.4979	1.01758		Std	15.7531	17.9948	17.029	13.9763	12.0397	16.8363	9.46098	10.6033	14.8636		Std	14.6677	12.749	10.9091	15.098	16.2207	16.8514	15.5698	15.923	15.7692		Std	0.048893	0.0544325	0.0588039	0.0604457	0.0617529	0.0563355	0.0658867	0.0523425	0.0528628		Std	1.26153	1.77705	1.4327	1.50853
	E10.5 Wdr11-/- slice culture
		Velocity								Accumulated distance								Euclidean distance								Directionality								Survival
	Cell	Slice 1	Slice 2	Slice 3	Slice 4	Slice 5	Slice 6		Cell	Slice 1	Slice 2	Slice 3	Slice 4	Slice 5	Slice 6		Cell	Slice 1	Slice 2	Slice 3	Slice 4	Slice 5	Slice 6		Cell	Slice 1	Slice 2	Slice 3	Slice 4	Slice 5	Slice 6		Cell	Slice 1	Slice 2	Slice 3	Slice 4	Slice 5	Slice 6
	1	4.65	4.54	3.18	11.84	3.32	5.45		1	113.33	116.68	93.76	133.65	94.15	79.89		1	52.44	64.71	75.12	58.83	41.44	41.99		1	0.39	0.47	0.69	0.37	0.57	0.39		1	16.5	15.5	17.5	15	15.5	18.5
	2	6.26	4.21	7.98	9.59	4.32	6.23		2	126.58	121.02	86.11	129.02	77.54	81.85		2	61.11	41.46	64.22	59.4	51.94	23.81		2	0.41	0.37	0.73	0.37	0.56	0.49		2	15	16	15	14	17	15
	3	7.12	5.66	9.77	10.06	5.3	12.3		3	110.93	103.86	108.6	116.54	93.65	109.29		3	47.46	39.73	79.87	54.54	49.15	19.23		3	0.38	0.36	0.67	0.41	0.61	0.48		3	15.5	14.5	18.5	16	13.5	19
	4	6.87	6.63	6.61	7.71	2.74	5.59		4	105.22	124.97	96.56	128.17	86.96	94.36		4	35.4	42.15	64.36	50.94	57.7	54.25		4	0.38	0.49	0.69	0.41	0.58	0.52		4	16	18	16	13.5	18.5	18
	5	3.81	5.13	4.7	5.64	3.4	6.46		5	120.87	117.33	112.43	131.82	79.91	71.37		5	18.5	48.85	68.62	39.15	65.82	50.92		5	0.31	0.39	0.69	0.42	0.55	0.51		5	15	18.5	14.5	16	16	14.5
	6	5.61	7.69	3.59	6.11	8.49	8.56		6	91.91	142.36	117.66	140.34	84.91	103.01		6	20.84	57.73	75.2	54.86	57.22	43.61		6	0.31	0.44	0.66	0.38	0.54	0.48		6	12.5	16	15.5	15	15.5	17
	7	3.12	8.91	3.96	7.72	4.12	6.43		7	125.85	131.6	122.37	134.94	92.21	63.71		7	49.16	24.66	61.26	19.92	59.44	32.89		7	0.35	0.39	0.63	0.41	0.59	0.52		7	16	15.5	17.5	17	16	16.5
	8	6.96	6.06	4.79	8.59	5.79	9.28		8	121.78	137.52	107.19	94.49	101.73	83.01		8	40.2	54.06	55.97	34.42	32.9	48.84		8	0.31	0.51	0.71	0.38	0.52	0.52		8	14	17	15.5	14	18.5	18.5
	9	7.45	7.61	7.89	10.51	2.58	5.7		9	130.1	105.36	102.86	118.52	95.78	115.19		9	50.57	46.68	91.55	41.06	36.69	30.53		9	0.34	0.4	0.67	0.43	0.58	0.43		9	16	13.5	16	15.5	17.5	21
	10	5.37	8.22	4.84	8.74	8.1	7.77		10	126.83	103.06	121.64	105.21	82.78	104.1		10	56	36.45	65.08	36.71	43.88	55.57		10	0.32	0.39	0.68	0.33	0.65	0.48		10	13.5	18.5	14	17	18	20.5
	11	4.75	2.88	6.65	5.9	4.63	8.61		11	99.61	85.6	95.17	90.51	93.55	90.49		11	40.28	57.36	82.34	44.82	68.07	38.78		11	0.38	0.43	0.66	0.37	0.48	0.47		11	13	15.5	17	13.5	14.5	16
	12	3.81	3.18	5.59	10.61	5.08	6.66		12	125.52	140.54	90.04	118.93	97.18	65.53		12	45.02	62.11	83.82	47.24	26.42	27.26		12	0.41	0.37	0.65	0.36	0.48	0.35		12	15.5	14	13.5	18.5	17.5	17
	13	8.15	3.45	8.64	8.35	7.84	3.37		13	87.77	146.48	116.53	146.31	105.49	87.32		13	47.33	39.8	76.94	33.03	52.82	46.03		13	0.4	0.4	0.66	0.31	0.52	0.54		13	14	18	13	13.5	15	17.5
	14	3.93	8.3	5.38	7.47	7.75	6.58		14	98.67	135.04	84.6	131.53	85.59	115.11		14	53.67	53.34	50.74	53.89	48.92	39.64		14	0.39	0.37	0.69	0.37	0.69	0.55		14	14.5	16	18	13	19	19
	15	5.25	6	7.42	6.57	5.74	7.66		15	118.73	105.31	95.35	119.66	108.89	102.39		15	50.49	34.67	74.61	62.56	41.64	59.01		15	0.32	0.48	0.69	0.42	0.6	0.48		15	15.5	17	14.5	14	14	18
	16	4.35	4.31	4.64	7.78	4.37	4.13		16	114.33	145.52	108.77	130.7	96.89	83.39		16	30.35	45.44	80.39	52.81	71.31	44.86		16	0.5	0.36	0.68	0.39	0.54	0.52		16	15	17	13.5	13.5	18.5	18
	17	5.92	8.13	5.88	3.91	6.01	6.19		17	121.33	126.75	99.97	125.63	97.51	71.47		17	41.21	58.68	60.35	54.3	71.92	41.65		17	0.42	0.45	0.69	0.5	0.59	0.44		17	15.5	14	14	17	17	17.5
	18	6.68	6.41	5.08	9.57	4.24	7.56		18	114.78	112.7	104.06	131.29	112.15	80.85		18	33.68	48.73	91.93	83.1	46.39	42.01		18	0.3	0.37	0.61	0.28	0.44	0.41		18	12	13.5	17	13.5	14	19.5
	19	4.55	10.48	7.39	6.27	4.89	7.77		19	108.52	133.71	92.16	150.45	89.85	77.42		19	26.15	66.28	39.69	42.05	77.59	38.24		19	0.41	0.39	0.67	0.4	0.4	0.38		19	13	18	14	18	18.5	19
	20	5.95	7.25	2.23	8.87	6.74	9.22		20	94.81	108.87	116.46	136.68	82.52	65.98		20	42.27	53.67	70.41	63.67	33.76	46.65		20	0.39	0.4	0.71	0.41	0.53	0.45		20	12.5	14	15.5	12.5	16	20
	Average	5.528	6.2525	5.8105	8.0905	5.2725	7.076		Average	112.873	122.214	103.614	125.719	92.962	87.2865		Average	42.1065	48.828	70.6235	49.365	51.751	41.2885		Average	0.371	0.4115	0.6765	0.386	0.551	0.4705		Average	14.525	16	15.5	15	16.5	18
	Std	1.39989	2.08821	1.95472	1.98037	1.77639	1.98301		Std	12.8097	16.9512	11.769	15.4164	9.47613	16.381		Std	11.6459	10.9317	13.291	13.7507	14.3424	10.5126		Std	0.0505652	0.0464843	0.0275824	0.0468368	0.068048	0.0557697		Std	1.37147	1.70139	1.64637	1.77705	1.73963	1.70139
																																		14.5	16	15.5	15	16.5	18
[truncated: 5 more columns]

## Sheet: Fig 3A
IFT140
Cilia base		Cilia Tip
WT	Wdr11 KO	WT	Wdr11 KO
4725.45	3399.45	2456.45	2653.45
5022.45	5470.45	1290.45	3062.45
4092.45	6094.45	2886.45	1585.45
3994.45	3309.45	2894.45	2799.45
7076.45	4043.45	1459.45	2834.45
4004.45	4579.45	2780.45	1851.45
3746.45	6599.45	1605.45	2701.45
3743.45	4311.45	947.451	2596.45
4579.45	2800.45	2849.45	1870.45
5481.45	5861.45	1282.45	2015.45
3180.45	1725.45	946.451	977.451
5215.45	3561.45	594.451	522.451		Table Analyzed	IFT140 Cilia base and tip
5299.45	2923.45	114.451	2532.45
2959.45	3646.45	706.451	237.451		Column B	Wdr11 KO
3457.45	4018.45	706.451	1303.45		vs.	vs.
4171.45	5459.45	2752.45	1803.45		Column A	WT
3546.45	4175.45	2195.45	2052.45
5436.45	5246.45	2326.45	1181.45		Unpaired t test with Welch's correction
6736.45	6335.45	1832.45	2017.45		P value	0.4838
2864.45	4462.45	542.451	1795.45		P value summary	ns
3802.45	7220.45	518.451	1236.45		Significantly different (P < 0.05)?	No
4911.45	4039.45	836.451	1728.45		One- or two-tailed P value?	Two-tailed
3905.45	5734.45	1746.45	848.451		Welch-corrected t, df	t=0.7032, df=86.87
5318.45	2069.45	410.451	1192.45
7176.45	4291.45	241.451	607.451		Table Analyzed	IFT140 Cilia base and tip
2982.45	6717.45	505.451	1337.54
2414.45	4010.45	185.451	772.451		Column D	Wdr11 KO
5000.45	4720.45	2860.45	381.451		vs.	vs.
4143.45	4565.45	2824.45	377.451		Column C	WT
4326.45	1894.45	2503.45	891.451
3315.45	3341.45	742.451	1485.45		Unpaired t test with Welch's correction
3001.45	3900.45	484.451	1836.45		P value	0.2975
2376.45	3127.45	28.4508	1846.45		P value summary	ns
5607.45	3067.45	882.451	2041.45		Significantly different (P < 0.05)?	No
5905.45	3997.45	1404.45	870.451		One- or two-tailed P value?	Two-tailed
4288.45	5333.45	364.451	1238.45		Welch-corrected t, df	t=1.048, df=82.31
2095.45	3740.45	697.451	476.451
3079.45	3691.45	931.451	1143.45
3140.45	5068.45	1879.45	786.451
4048.45	6518.45	994.451	1488.45
3918.45	3745.45	592.451	2895.45
2656.45	4086.45	197.451	2130.45
6775.45	6629.45	1996.45	163.451
	4844.45		587.451
	5449.45		1530.45
	5449.45		1530.45

## Sheet: Fig 3B
IFT57
Cilia base		Cilia Tip
WT	Wdr11 KO	WT	Wdr11 KO
8074.45	6035.45	4263.45	5068.45
7363.45	5499.45	2160.45	3459.45
7384.45	6664.45	1508.45	3104.45
6723.45	5614.45	3588.45	3866.45
4994.45	6482.45	2322.45	5231.45
4514.45	7242.45	1232.45	3798.45
9040.45	6321.45	3407.45	4387.45
7328.45	7645.45	5311.45	5074.45
6948.45	8615.45	6238.45	7044.45
8209.45	8530.45	2995.45	6652.45
8108.45	6258.45	2117.45	4203.45
8348.45	6960.45	4506.45	4022.45
8913.45	7925.45	1348.45	7101.45		Table Analyzed	IFT57 Cilia base and tip
6584.45	8181.45	2338.45	6972.45
7381.45	8010.45	2839.45	5177.45		Column B	Wdr11 KO
5072.45	7505.45	1950.45	6848.45		vs.	vs.
7551.45	5671.45	3371.45	4655.45		Column A	WT
5801.45	5316.45	4873.45	5519.45
5989.45	7530.45	3247.45	6345.45		Unpaired t test with Welch's correction
6464.45	7401.45	4270.45	6081.45		P value	0.0176
6999.45	6591.45	5449.45	7446.45		P value summary	*
9377.45	8231.45	1846.45	7635.45		Significantly different (P < 0.05)?	Yes
8593.45	8922.45	2536.45	7899.45		One- or two-tailed P value?	Two-tailed
9190.45	8504.45	1622.45	6578.45		Welch-corrected t, df	t=2.416, df=93.21
8215.45	7824.45	2676.45	5637.45
8715.45	7316.45	2369.45	6820.45		Table Analyzed	IFT57 Cilia base and tip
9344.45	5532.45	1581.45	5625.45
8948.45	6309.45	1817.45	4030.45		Column D	Wdr11 KO
7508.45	6063.45	2504.45	4805.45		vs.	vs.
9091.45	5093.45	3943.45	3910.45		Column C	WT
6983.45	6349.45	2194.45	5976.45
7567.45	5220.45	2968.45	3321.45		Unpaired t test with Welch's correction
7380.45	6197.45	1839.45	5534.45		P value	<0.0001
6694.45	6494.45	5025.45	4043.45		P value summary	****
8095.45	3943.45	3778.45	3076.45		Significantly different (P < 0.05)?	Yes
8307.45	7168.45	2388.45	5529.45		One- or two-tailed P value?	Two-tailed
7040.45	7514.45	3540.45	4933.45		Welch-corrected t, df	t=9.992, df=97.48
5086.45	7356.45	2229.45	5649.45
4787.45	6404.45	2267.45	4839.45
6592.45	7404.45	1117.45	5520.45
7600.45	5115.45	1344.45	4025.45
7305.45	6613.45	3243.45	6679.45
8124.45	7082.45	3501.45	5220.45
8308.45	7103.45	2784.45	7377.45
5955.45	5569.45	3010.45	4385.45
7001.45	6565.45	1880.45	4939.45
7854.45	8390.45	2880.45	5949.45
5426.45	7184.45	770.451	4106.45
	4780.45		4909.45
	7208.45		5053.45
	6388.45		5758.45
	6388.45		5758.45

## Sheet: Fig 3C
IFT88
Cilia base		Cilia Tip
WT	Wdr11 KO	WT	Wdr11 KO
4768.45	2472.45	3247.45	3434.45
4430.45	3573.45	2897.45	1911.45
2816.45	2221.45	2755.45	4233.45
3385.45	1727.45	1604.45	2400.45
3273.45	2473.45	3447.45	2895.45
3378.45	1936.45	2297.45	2531.45
2809.45	1202.45	2072.45	1554.45
2166.45	1579.45	693.451	2141.45
1561.45	1344.45	1345.45	2024.45
2875.45	3247.45	1828.45	2237.45
3878.45	2648.45	2630.45	2043.45
3477.45	3857.45	2825.45	3221.45
4786.45	2211.45	2260.45	1016.45		Table Analyzed	IFT88 Cilia base and tip
6262.45	2010.45	4828.45	2739.45
5186.45	2248.45	1353.45	2371.45		Column B	Wdr11 KO
2695.45	1528.45	461.451	1757.45		vs.	vs.
4847.45	1414.45	1425.45	1142.45		Column A	WT
5154.45	1936.45	1620.45	1847.45
4628.45	2987.45	3432.45	2850.45		Unpaired t test with Welch's correction
2570.45	2943.45	2877.45	1957.45		P value	<0.0001
4941.45	2491.45	2492.45	2541.45		P value summary	****
4631.45	4550.45	4287.45	2720.45		Significantly different (P < 0.05)?	Yes
3591.45	2854.45	2761.45	2915.45		One- or two-tailed P value?	Two-tailed
2330.45	2774.45	2644.45	2159.45		Welch-corrected t, df	t=8.105, df=90.07
2918.45	2241.45	2100.45	1907.45
2568.45	3354.45	3185.45	2799.45		Table Analyzed	IFT88 Cilia base and tip
2440.45	3777.45	3231.45	4019.45
3791.45	2881.45	2350.45	4022.45		Column D	Wdr11 KO
4645.45	2623.45	3321.45	2912.45		vs.	vs.
2505.45	2701.45	1936.45	2710.45		Column C	WT
2962.45	2236.45	2159.45	1385.45
3127.45	3046.45	3257.45	3194.45		Unpaired t test with Welch's correction
3631.45	1946.45	3361.45	1849.45		P value	0.0019
4701.45	3030.45	3295.45	3758.45		P value summary	**
4251.45	1732.45	5232.45	1829.45		Significantly different (P < 0.05)?	Yes
4376.45	2480.45	2441.45	1852.45		One- or two-tailed P value?	Two-tailed
5174.45	1867.45	4355.45	2245.45		Welch-corrected t, df	t=3.210, df=79.33
5119.45	1807.45	2853.45	1660.45
4605.45	1264.45	6719.45	1501.45
3922.45	1302.45	5155.45	1723.45
3384.45	1529.45	3286.45	1546.45
2254.45	1015.45	2068.45	917.451
5304.45	1571.45	2546.45	1615.45
4037.45	1827.45	4583.45	1839.45
4307.45	3751.45	3286.45	1564.45
4194.45	1411.45	2273.45	985.451
3363.45	2080.45	3798.45	2370.45
4433.45	2276.45	3206.45	2274.45
5337.45	1165.45	6281.45	1516.45
	3209.45		2591.45
	1589.45		2030.45
	1354.45		1381.45
	3119.45		3437.45

## Sheet: Fig 4C
Fig 4C
Cells with IFT20 on the centriol (%)
Image#	WT	Wdr11 KO						Table Analyzed	Cep164 ift20
1	80	16.6667
2	84.6154	25						Column C	Wdr11 KO
3	80	11.1111						vs.	vs.
4	77.7778	11.1111						Column B	WT
5	83.3333	11.1111
6	92.3077	12.5						Unpaired t test with Welch's correction
7	87.5	11.1111						P value	<0.0001
8	90	11.7647						P value summary	****
9	92.3077	12.5						Significantly different (P < 0.05)?	Yes
10	87.5	16.6667						One- or two-tailed P value?	Two-tailed
11	85.5342	13.9543						Welch-corrected t, df	t=36.43, df=19.49

## Sheet: Fig 5B
Ptch2
WT	Wdr11 KO					Table Analyzed	Ptch2
1.04568	0.32481
1.28054	0.404612					Column B	Wdr11 KO
1.19406	0.218575					vs.	vs.
1.04427	0.201539					Column A	WT
1.05143	0.250948
1.02336	0.266638					Unpaired t test with Welch's correction
1.18329	0.185038					P value	<0.0001
1.08249	0.283865					P value summary	****
	0.25668					Significantly different (P < 0.05)?	Yes
	0.390474					One- or two-tailed P value?	Two-tailed
						Welch-corrected t, df	t=20.50, df=13.25
Gas1
WT	Wdr11 KO
1.24535	0.34671					Table Analyzed	Gas1
0.886976	0.206136
1.16885	0.268764					Column B	Wdr11 KO
0.98904	0.356158					vs.	vs.
1.08099	0.254835					Column A	WT
1.04041	0.22724
1.41144	0.246497					Unpaired t test with Welch's correction
0.874303	0.172272					P value	<0.0001
0.926066	0.350553					P value summary	****
1.33925	0.263606					Significantly different (P < 0.05)?	Yes
	0.248556					One- or two-tailed P value?	Two-tailed
	0.279319					Welch-corrected t, df	t=13.32, df=10.39
WT	Wdr11 KO					Table Analyzed	PSRC
1.6658	0.082211
1.05933	0.0754418					Column B	Wdr11 KO
1.87321	0.0745357					vs.	vs.
1.64727	0.0452066					Column A	WT
1.14759	0.0125078
1.39168	0.00895001					Unpaired t test with Welch's correction
1.16698	0.0159135					P value	<0.0001
1.22716	0.0180717					P value summary	****
1.22683	0.0172631					Significantly different (P < 0.05)?	Yes
1.31405	0.016921					One- or two-tailed P value?	Two-tailed
1.16025	0.0331079					Welch-corrected t, df	t=16.55, df=10.20
	0.0232032

## Sheet: Fig 5D
Ptch2
WT		KO						Table Analyzed	Ptch2 DMF Shh WT KO
DMF	Shh	DMF	Shh
0.067328	0.582451	0.042415	0.032969					Column B	Shh
0.04264	0.624099	0.044411	0.049537					vs.	vs.
0.058628	0.574037	0.045876	0.042734					Column A	DMF
0.045547	0.689811	0.041012	0.042211
0.064847	0.49496	0.041782	0.048101					Unpaired t test with Welch's correction
								P value	<0.0001
								P value summary	****
								Significantly different (P < 0.05)?	Yes
								One- or two-tailed P value?	Two-tailed
								Welch-corrected t, df	t=16.61, df=4.196
Gas1
WT		KO						Table Analyzed	Gas1 DMF Shh WT KO
DMF	Shh	DMF	Shh
0.064798	0.495044	0.044924	0.055155					Column B	Shh
0.072983	0.519703	0.040304	0.068665					vs.	vs.
0.036105	0.337862	0.05611	0.029782					Column A	DMF
0.024119	0.468418	0.025953	0.009985
0.037498	0.472164	0.029463	0.034282					Unpaired t test with Welch's correction
0.017356								P value	<0.0001
								P value summary	****
								Significantly different (P < 0.05)?	Yes
								One- or two-tailed P value?	Two-tailed
								Welch-corrected t, df	t=12.69, df=4.661
Smo
WT		KO						Table Analyzed	Smo DMF Shh WT KO
DMF	Shh	DMF	Shh
0.057645	0.562934	0.082866	0.061513					Column B	Shh
0.105886	0.479135	0.054314	0.058518					vs.	vs.
0.114481	0.563766	0.106512	0.081694					Column A	DMF
0.087132	0.503957	0.060803	0.061248
0.108808	0.498678	0.078669	0.095402					Unpaired t test with Welch's correction
0.062657			0.108951					P value	<0.0001
								P value summary	****
								Significantly different (P < 0.05)?	Yes
								One- or two-tailed P value?	Two-tailed
								Welch-corrected t, df	t=21.44, df=6.490
P-CREB
WT		KO						Table Analyzed	p-CREB DMF Shh WT KO
DMF	Shh	DMF	Shh
0.240762	1.80855	0.284303	1.04103					Column B	Shh
0.301894	2.12877	0.163333	1.12889					vs.	vs.
0.245133	1.64902	0.206758	0.811539					Column A	DMF
0.19756	1.87796	0.170759	0.831683
0.194298	1.71007	0.247269	1.06168					Unpaired t test with Welch's correction
0.252568	1.79569	0.21954	0.972468					P value	<0.0001
0.132796	2.06183	0.294374	0.93481					P value summary	****
0.219653	1.61707	0.197805	0.901601					Significantly different (P < 0.05)?	Yes
	2.06596	0.236274	0.860786					One- or two-tailed P value?	Two-tailed
								Welch-corrected t, df	t=24.87, df=9.234

## Sheet: Fig 6B
	NIH3T3 cells in serum and 24hours serum starvation
	Exp1
		Gapdh	WT serum	WT no serum
			14.16	14.87
			13.88	15.02
			13.99	15.07
		Av	14.01	14.9867
		Std	0.141067	0.104083
									Raw
		Gas1	WT serum	WT no serum					Gas1	WT serum	WT no serum
			26.96	22.26						0.000125213	0.0064343
			27.07	22.19
			26.89	22.35
		Av	26.9733	22.2667
		Std	0.0907377	0.0802081
	Exp2
		Gapdh	WT serum	WT no serum
			13.79	15.05
			14.08	15
			13.84	14.93
		Av	13.9033	14.9933
		Std	0.155027	0.0602771														Gas1	WT serum	WT no serum
																		Exp1	0.00013	0.0064
																		Exp2	0.00011	0.0066
																		Exp3	0.00015	0.0064
									Raw									Average	0.00013	0.00646667
		Gas1	WT serum	WT no serum					Gas1	WT serum	WT no serum							SEM	1.1547e-05	6.66667e-05
			27.14	22.15						0.000112848	0.0066305
			26.87	22.3
			27.04	22.24
		Av	27.0167	22.23
		Std	0.136504	0.0754983
	Exp3
		Gapdh	WT serum	WT no serum
			13.97	14.76
			14.05	15.05
			13.87	14.88
		Av	13.9633	14.8967
		Std	0.090185	0.145717
									Raw
		Gas1	WT serum	WT no serum					Gas1	WT serum	WT no serum
			26.52	22.13						0.000145839	0.0064343
			26.88	22.16
			26.72	22.24
		Av	26.7067	22.1767
		Std	0.18037	0.0568624

[truncated: 17 more sheets: Fig 6C, Fig 6D, Fig 7B, Fig 8B, Fig 8C, Fig 8D, Fig 8E, Fig S2C, Fig S3B, Fig S4B, Fig S5, Fig S6A, Fig S7A, Fig S7B, Fig S8A, B, E, Fig S8C, Fig S8D]
